# Supplementary material for: Mineralocorticoid Receptor Mediates Cortisol Regulation of Ionocyte Development in Tilapia (Oreochromis mossambicus)
Source: MDPI journal article supplement (doi:10.3390/fishes8060283), 2023-05-25
Supplement: s1 [file s1]

```

      R D G Q V L G R R C F E A R I C A C P G
1  CAGAGACGGT CAGGTTTTAG GCGCGCGTTG CTTCGAAGCC AGGATCTGCG CCTGCCCGGG
      R D R K A D E D S I R K Q H V T D A T K
61 CCGAGATCGC AAGGCGGACG AGGACAGCAT CCGCAAGCAG CACGTAAACGG ACGCCACTAA
      S S E G T K R P F R Q V S H G I Q M S T
121 GAGCAGTGAG GGTACGAAAC GCCCCTTCCG ACAGGTTTCC CACGGCATAAC AGATGTCCAC
      I K K R R S T D E E V F C L P I K G R E
181 CATCAAGAAG AGAAGATCCA CAGATGAGGA AGTTTTTTGT TTGCCTATTA AAGGACGCGA
      I Y E I L V K I K E S L E L M Q F L P Q
241 AATCTATGAG ATTTTGGTAA AAATCAAAGA GTCGCTGGAA CTCATGCAGT TCCTGCCGCA
      H T I E S Y R Q Q Q Q N L L Q K Q T S M
301 GCACACAATA GAGTCATACA GACAGCAGCA GCAGAACCTC CTGCAGAAAC AAACCTCCAT
      S S Q P S F G S T S P T P G K V N K L P
361 GTCATCTCAG CCCTCCTTCG GCTCCACCTC GCGCAACCCC GGAAAGGTCA ACAAGCTGCC
      S V S Q L I N P Q Q R N T L T P S S M S
421 CTCGGTCAGC CAGCTCATCA ACCCCCAGCA GCGTAACACG CTCACCCCGT CCAGCATGTC
      G G L T D M T P M M G T H I P M N A D M
481 TGGAGGCCTC ACTGACATGA CTCCCATGAT GGGCACTCAC ATCCCCATGA ATGCCGACAT
      S S L S P T H A L Q P Q L P L V P S S H
541 GAGTTCACTG AGCCCCACAC ACGCCCTGCA GCCACAGCTG CCCCTGGTGC CCTCCTCCCA
      C T P P P P Y P M D S S I S S F L I R L
601 CTGTACCCCC CCTCCTCCAT ACCCCATGGA CAGCAGCATC TCCAGCTTCC TTATTGGTTC
      G C A G C L D Y F T T Q G L T N I Y Q I
661 GGGCTGCGCC GGCTGCTTGG ACTACTTCAC AACACAGGGC CTAACCAACA TCTACCAGAT
      E N Y N M E D L S R L K I P A E F Q H I
721 TGAGAACTAT AACATGGAGG ACCTGTCCAG GCTGAAGATC CCCGCCGAGT TCCAGCACAT
      I W K G I M E H R Q A M D F S P P P H I
781 CATCTGGAAG GGCATCATGG AGCACCGACA GGCTATGGAT TTTTCCCCTC CTCCCCACAT
      V R T T G S A S T V S V G S S E A R G E
841 AGTGCGCACC ACCGGCAGCG CCTCCACCGT CAGCGTGGGC TCCTCCGAGG CGCGGGGCGA
      R V I D A V R F T L R Q T I S F P P R D
901 GCGCGTCATC GACGCCGTGC GCTTACCCCT GCGCCAGACC ATCTCCTTCC CGCCCCGCGA
      E W S D F S F D L D S R R N K Q O R I K
961 CGAGTGGTCC GACTTCTCCT TCGACCTGGA TTCGCGCCGC AACAAACAGC AGCGCATCAA
      E E G E #
1021 GGAGGAGGGA GAGTAAGACG CCGCCACCGC CGCTGCGTCC CCACTTGTCA TTTACGCTCT
1081 GCTGATGAAC ATTTTCATTTG AAAACCTGCT GTTTAGTGCA AAGCCTGCTG AGAACAAACA
1141 GACGCACTTA CTTTCATGTT GTC

```

**Figure S1.** Nucleotide and deduced amino acid sequences of tumor protein 63 (P63) cDNA from tilapia gill epithelial cells. # Translational stop codon. Accession no. OQ626354.

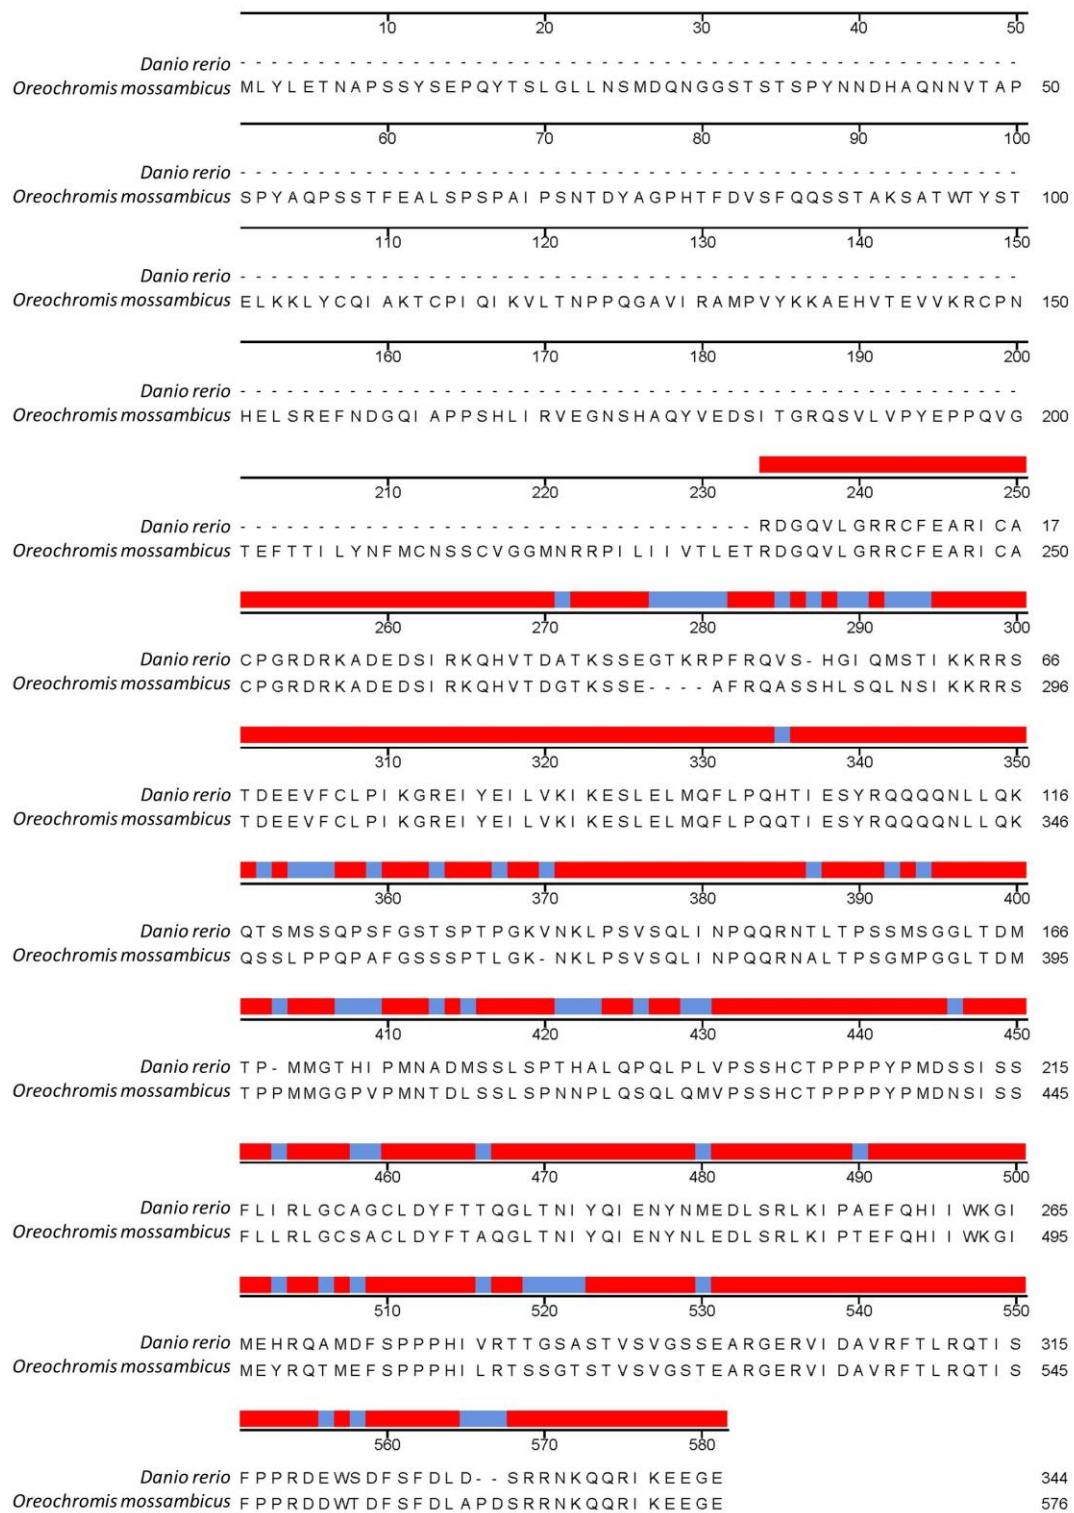

**Figure S2.** The nucleotide sequence alignment of zebrafish  $\Delta$ Np63 (Accession no. AAM48108.1) and tilapia P63. The identical amino acids are indicated by red uplines, and the non-identical amino acids were indicated by blue uplines.
