# Supplementary material for: Mineralocorticoid Receptor Mediates Cortisol Regulation of Ionocyte Development in Tilapia (Oreochromis mossambicus)
Source: MDPI journal article supplement (doi:10.3390/fishes8060283), 2023-05-25
Supplement: s1 [file s1]

Archive with 1 entries (1 files):
- fishes-2378204-supplementary.pdf
